# Supplementary material
Source: ML conference proceedings conference paper supplement (https://proceedings.neurips.cc/paper_files/paper/2013/hash/5ef0b4eba35ab2d6180b0bca7e46b6f9-Abstract.html)
Supplement: Supplementary file [file 5ef0b4eba35ab2d6180b0bca7e46b6f9-Supplemental.zip]

---

# Probabilistic Low-Rank Matrix Completion with Adaptive Spectral Regularization Algorithms: Supplementary Material

---

**Adrien Todeschini**  
INRIA - IMB - Univ. Bordeaux  
33405 Talence, France  
Adrien.Todeschini@inria.fr

**François Caron**  
Univ. Oxford, Dept. of Statistics  
Oxford, OX1 3TG, UK  
Caron@stats.ox.ac.uk

**Marie Chavent**  
Univ. Bordeaux - IMB - INRIA  
33000 Bordeaux, France  
Marie.Chavent@u-bordeaux2.fr

## A Estimation of the noise parameter $\sigma^2$

If we assume that  $\sigma^2 \sim \text{InvGamma}(a_\sigma, b_\sigma)$ , then at each iteration of the algorithm we can maximize w.r.t.  $\sigma^2$  given  $Z^{(t)}$  in the E step to obtain

$$\sigma^{2(t)} = \frac{a_\sigma + \|X - Z^{(t)}\|_F^2}{b_\sigma + mn}$$

## B Proof of Eq. (13)

$$\begin{aligned} Q(Z, Z^*) &= \mathbb{E}[\log(p(P_\Omega(X), P_\Omega^\perp(X), Z, \gamma)) | Z^*, P_\Omega(X))] \\ &= C_3 - \frac{1}{2\sigma^2} \mathbb{E} \left[ \|P_\Omega(X) + P_\Omega^\perp(X) - Z\|_F^2 | Z^*, P_\Omega(X) \right] - \sum_{i=1}^r \mathbb{E}[\gamma_i | d_i^*] d_i \\ &= C_3 - \frac{1}{2\sigma^2} \left\{ \|P_\Omega(X) - P_\Omega(Z)\|_F^2 \right. \\ &\quad \left. + \mathbb{E} \left[ \|P_\Omega^\perp(X) - P_\Omega^\perp(Z)\|_F^2 | Z^*, P_\Omega(X) \right] \right\} - \sum_{i=1}^r \mathbb{E}[\gamma_i | d_i^*] d_i \\ &= C_4 - \frac{1}{2\sigma^2} \left\{ \|P_\Omega(X) - P_\Omega(Z)\|_F^2 + \|P_\Omega^\perp(Z^*) - P_\Omega^\perp(Z)\|_F^2 \right\} - \sum_{i=1}^r \mathbb{E}[\gamma_i | d_i^*] d_i \\ &= C_4 - \frac{1}{2\sigma^2} \left\{ \|P_\Omega(X) + P_\Omega^\perp(Z^*) - Z\|_F^2 \right\} - \sum_{i=1}^r \mathbb{E}[\gamma_i | d_i^*] d_i \end{aligned}$$

## C Generalization to other mixing distributions

Although we focused on a gamma mixing distribution for its simplicity, it is possible to use other mixing distributions  $p(\gamma_i)$ , such as inverse Gaussian or improper Jeffreys distributions. More generally, one can consider the three parameters generalized inverse Gaussian distribution [1], which includes the gamma, inverse gamma, inverse Gaussian and Jeffreys distributions as special cases. Table 1 provides the weights  $\omega_i$  depending on the choice of  $p(\gamma_i)$ .

Table 1: Expressions of various mixing densities and associated weights.  $K_\nu$  denotes the modified Bessel function of the third kind.

| Mixing density<br>$p(\gamma_i)$                                                                                                                                                 | Marginal density<br>$p(d_i)$                                                                                                | Weights<br>$\omega_i = \mathbb{E}[\gamma_i   d_i^*]$                                                                            |
|---------------------------------------------------------------------------------------------------------------------------------------------------------------------------------|-----------------------------------------------------------------------------------------------------------------------------|---------------------------------------------------------------------------------------------------------------------------------|
| $\text{Gamma}(\gamma_i; a, b) = \frac{b^a}{\Gamma(a)} \gamma_i^{a-1} e^{-b\gamma_i}$                                                                                            | $\frac{ab^a}{(d_i+b)^{a+1}}$                                                                                                | $\frac{a+1}{b+d_i^*}$                                                                                                           |
| $i\text{Gauss}(\gamma_i; \delta, \gamma)$<br>$= \frac{\delta}{\sqrt{2\pi}} e^{\delta\gamma} \gamma_i^{-3/2} e^{-\frac{1}{2}(\delta^2\gamma_i^{-1} + \gamma^2\gamma_i)}$         | $\frac{\delta}{\sqrt{\gamma^2+2d_i}} e^{\delta(\gamma - \sqrt{\gamma^2+2d_i})}$                                             | $\frac{\delta}{\sqrt{\gamma^2+2d_i^*}} \left( 1 + \frac{1}{\delta\sqrt{\gamma^2+2d_i^*}} \right)$                               |
| $\propto 1/\gamma_i$                                                                                                                                                            | $\propto 1/d_i$                                                                                                             | $1/d_i^*$                                                                                                                       |
| $\text{GiG}(\gamma_i; \nu, \delta, \gamma)$<br>$= \frac{(\gamma/\delta)^\nu}{2K_\nu(\delta\gamma)} \gamma_i^{\nu-1} e^{-\frac{1}{2}(\delta^2\gamma_i^{-1} + \gamma^2\gamma_i)}$ | $\frac{\delta\gamma^\nu}{K_\nu(\delta\gamma)} \frac{K_{\nu+1}(\delta\sqrt{\gamma^2+2d_i})}{(\sqrt{\gamma^2+2d_i})^{\nu+1}}$ | $\frac{\delta}{\sqrt{\gamma^2+2d_i^*}} \frac{K_{\nu+2}(\delta\sqrt{\gamma^2+2d_i^*})}{K_{\nu+1}(\delta\sqrt{\gamma^2+2d_i^*})}$ |

## D Binary matrix completion

We have considered real valued matrices  $X$ . We now show how it is possible to apply the same methodology to binary, incomplete matrices of entries  $Y_{ij} \in \{-1, 1\}$ . Similarly to [2], we assume the following probit model

$$Y_{ij} | Z_{ij} \sim \text{Ber} \left( \Phi \left( \frac{Z_{ij}}{\sigma} \right) \right)$$

where  $\Phi(x) = \int_{-\infty}^x \varphi(u) du$  is the cumulative distribution function of the standard Gaussian distribution with  $\varphi(u) = \frac{1}{\sqrt{2\pi}} \exp(-\frac{u^2}{2})$ . The model can be alternatively written using Gaussian latent variables  $X_{ij}$

$$X_{ij} | Z_{ij} \sim \mathcal{N}(Z_{ij}, \sigma^2)$$

$$Y_{ij} = \begin{cases} +1 & \text{if } X_{ij} > 0 \\ -1 & \text{otherwise} \end{cases}$$

We will use the variables  $X_{ij}$  as additional latent variables in the EM. We have

$$\mathbb{E}[X_{ij} | P_\Omega(Y), Z] = \begin{cases} Z_{ij} + \frac{\varphi\left(\frac{Z_{ij}}{\sigma}\right)}{1 - \Phi\left(-\frac{Z_{ij}}{\sigma}\right)} & \text{if } Y_{i,j}^\Omega = +1 \\ Z_{ij} - \frac{\varphi\left(\frac{Z_{ij}}{\sigma}\right)}{\Phi\left(-\frac{Z_{ij}}{\sigma}\right)} & \text{if } Y_{i,j}^\Omega = -1 \\ Z_{ij} & \text{if } Y_{i,j}^\Omega = 0 \end{cases}$$

where we use the shorter notation  $Y_{i,j}^\Omega = P_\Omega(Y)(i, j)$ . We will now derive the EM algorithm, by using latent variables  $\gamma_i$  and  $X$ . The E step is given by

$$\begin{aligned} Q(Z, Z^*) &= \mathbb{E}[\log(p(P_\Omega(Y), X, Z, \gamma)) | Z^*, P_\Omega(Y)] \\ &= C_5 - \frac{1}{2\sigma^2} \|X^* - Z\|_F^2 - \sum_{i=1}^r \mathbb{E}[\gamma_i | d_i^*] d_i \end{aligned} \quad (1)$$

where the matrix  $X^*$  is defined as

$$X_{ij}^* = \begin{cases} Z_{ij}^* + \frac{\varphi\left(\frac{Z_{ij}^*}{\sigma}\right)}{1 - \Phi\left(-\frac{Z_{ij}^*}{\sigma}\right)} & \text{if } Y_{i,j}^\Omega = +1 \\ Z_{ij}^* - \frac{\varphi\left(\frac{Z_{ij}^*}{\sigma}\right)}{\Phi\left(-\frac{Z_{ij}^*}{\sigma}\right)} & \text{if } Y_{i,j}^\Omega = -1 \\ Z_{ij}^* & \text{if } Y_{i,j}^\Omega = 0 \end{cases}$$

Again, the maximum of the function (1) is obtained analytically using a weighted soft thresholded SVD on the matrix  $X^*$ .

## References

- [1] O.E. Barndorff-Nielsen and N. Shephard. Non-Gaussian Ornstein-Uhlenbeck-based models and some of their uses in financial economics. *Journal of the Royal Statistical Society B*, 63:167–241, 2001.
- [2] M.A.T. Figueiredo. Adaptive sparseness for supervised learning. *IEEE Transactions on Pattern Analysis and Machine Intelligence*, 25(9):1150–1159, 2003.
